# Supplementary material
Source: publisher figshare collection journal article supplement (https://tandf.figshare.com/articles/dataset/_/1486462)
Supplement: Supplementary file 1 [file 1]

## Appendix

Let  $F_{r,s,\delta}(\cdot)$  denote the noncentral  $F$ -distribution with degrees of freedom  $r$  and  $s$  and non-centrality parameter  $\delta$ , and let  $F_{r,s}(\cdot) = F_{r,s,0}(\cdot)$ . The mean and variance of  $F_{r,s,\delta}(\cdot)$  are

$$\frac{s(r+\delta)}{r(s-2)} \text{ and } 2 \frac{(r+\delta)^2 + (r+2\delta)(s-2)}{(s-2)^2(s-4)}, \quad (11)$$

assuming that  $s > 2$  and  $s > 4$ , respectively.

We use the following representation of these distributions (Johnson et al. (1995), eq. (30.10)),

$$F_{r,s,\delta}(u) = \sum_{l=0}^{\infty} \frac{e^{-\frac{\delta}{2}} \left(\frac{\delta}{2}\right)^l}{l!} F_{r+2l,s} \left( \frac{ru}{r+2l} \right) \quad (12)$$

$$F_{r,s}(u) = I_{\frac{ru}{ru+s}} \left( \frac{r}{2}, \frac{s}{2} \right), \quad (13)$$

where  $I_u(a, b)$  is the regularized incomplete beta function (i.e., beta distribution function) given by

$$I_u(a, b) = \frac{1}{B(a, b)} \int_0^u t^{a-1} (1-t)^{b-1} dt, \quad (14)$$

where  $B(a, b) = \frac{\Gamma(a)\Gamma(b)}{\Gamma(a+b)}$  is the usual beta function.

**Proof of Lemma 1.** The conditional distribution of the projected data matrix  $\mathbf{X}\mathbb{R}$  and  $\mathbf{Y}\mathbb{R}$ , given  $\mathbb{R}$ , are independent  $N_k(\mathbb{R}'\mu_1, \mathbb{R}'\Sigma\mathbb{R})$  and  $N_k(\mathbb{R}'\mu_2, \mathbb{R}'\Sigma\mathbb{R})$ , respectively. Note that  $S_{\mathbb{R}} = \mathbb{R}'S\mathbb{R}$ , given  $\mathbb{R}$ , is distributed as Wishart  $W_k \left( \frac{1}{n_1+n_2-1} \mathbb{R}'\Sigma\mathbb{R}, n_1+n_2-2 \right)$ . According to Theorem 3.4.8 of Mardia et al. (1979),

$$|S_{\mathbb{R}}| = |\mathbb{R}'\Sigma\mathbb{R}| \prod_{j=1}^k \chi_{n_1+n_2-j-1}^2, \quad (15)$$

where  $\chi_{n_1+n_2-j-1}^2$  for  $j = 1, \dots, k$  are independent  $\chi^2$  random variables. From expression (15), the proof is completed by showing that  $\lambda_{\min}(\mathbb{R}'\Sigma\mathbb{R}) > 0$  with probability 1, where  $\lambda_{\min}(A)$  is the minimum eigenvalue of the matrix  $A$ . Now, observe that

$$\begin{aligned} \lambda_{\min}(\mathbb{R}'\Sigma\mathbb{R}) &= \inf_{\|u\|_2=1} u'\mathbb{R}'\Sigma\mathbb{R}u \\ &\geq \inf_{\|v\|_2=1} v'\Sigma v \inf_{\|u\|_2=1} \|\mathbb{R}u\|^2 = \lambda_{\min}(\Sigma) > 0. \end{aligned}$$

□

## Proof of Theorem 1

*Part (a).* Note that

$$E[\phi(T_{\mathbb{R}}^2)] = E_{\mathbb{R}} \{ E_{\mathbf{x}, \mathbf{Y}} [\phi(T_{\mathbb{R}}^2) | \mathbb{R}] \} = E_{\mathbb{R}} \left\{ P_{\mathbf{x}, \mathbf{Y}} \left[ \frac{n-k+1}{k} \cdot \frac{T_{\mathbb{R}}^2}{n} > c_{\alpha} \middle| \mathbb{R} \right] \right\}. \quad (16)$$

Under  $\mathbf{H}_0$ , the conditional distribution of  $\frac{n-k+1}{k} \frac{T_{\mathbb{R}}^2}{n}$  is  $F_{k, n-k+1}$ , independent of  $\mathbb{R}$ . By (5), we have  $E[\phi(T_{\mathbb{R}}^2) | \mathbf{H}_0] = \mathbf{E}_{\mathbb{R}} \{ \alpha \} = \alpha$ .

*Part (b).* Under  $\mathbf{H}_1^*$  and for fixed  $\mathbb{R}$ , the conditional distribution of  $\frac{n-k+1}{k} \frac{T_{\mathbb{R}}^2}{n}$  is  $F_{k, n-k+1, (n_1^{-1} + n_2^{-1})^{-1} \Delta_{\mathbb{R}}}$ . (Recall that  $\Delta_{\mathbb{R}} = (\mu_1 - \mu_2)' \mathbb{R} (\mathbb{R}' \Sigma \mathbb{R})^{-1} \mathbb{R}' (\mu_1 - \mu_2)$ .) By (11) with  $r = k$ ,  $s = n - k + 1$ , and  $\delta = 0$  we have that  $c_{\alpha} \rightarrow 1$ . By (11) with  $r = k$ ,  $s = n - k + 1$ , and  $\delta = (n_1^{-1} + n_2^{-1})^{-1} \Delta_{\mathbb{R}}$  we have under  $\mathbf{H}_1^*$ , and for fixed  $\mathbb{R}$ , that the mean and variance of  $\frac{n-k+1}{k} \frac{T_{\mathbb{R}}^2}{n}$  behave asymptotically as  $c_{\alpha} + (n_1^{-1} + n_2^{-1})^{-1} \Delta_{\mathbb{R}} / k$  and  $2/n$ , respectively. (We say that  $a$  behaves asymptotically as  $b$  if  $a/b \rightarrow 1$ .)

It then follows from (5), (6), (16), and Chebychev's inequality that

$$E[\phi(T_{\mathbb{R}}^2) | \mathbf{H}_1^*] = \mathbf{E}_{\mathbb{R}} \{ \mathbf{E}_{\mathbf{x}, \mathbf{Y}} [\phi(T_{\mathbb{R}}^2) | \mathbb{R}, \mathbf{H}_1^*] \} \rightarrow 1. \quad (17)$$

*Part (c).* Using the property that  $I_u(a+1, b) \leq I_u(a, b)$ , and (13), we have

$$\begin{aligned} I_{\frac{kc_{\alpha}}{kc_{\alpha} + n - k + 1}} \left( \frac{k}{2} + l, \frac{n-k+1}{2} \right) &\leq I_{\frac{kc_{\alpha}}{kc_{\alpha} + n - k + 1}} \left( \frac{k}{2}, \frac{n-k+1}{2} \right) \\ &= F_{k, n-k+1}(c_{\alpha}) = 1 - \alpha. \end{aligned} \quad (18)$$

Thus, using (16) and (18), we have  $E[\phi(T_{\mathbb{R}}^2) | \mathbf{H}_1] \geq \alpha$ .  $\square$

**Proof of Theorem 2** By evaluating the conditional probability that  $\bar{\theta}^* < u$  given the data, and then taking an expectation over the data, we have

$$P[\bar{\theta}^* < u] = E_{\mathbf{x}, \mathbf{Y}} \left\{ P_{\mathbb{R}} \left[ \bar{\theta}^* < u \middle| \mathbf{X}, \mathbf{Y} \right] \right\}. \quad (19)$$

Note that

$$P_{\mathbb{R}} \left[ \bar{\theta}^* < u \middle| \mathbf{X}, \mathbf{Y} \right] = P_{\mathbb{R}} \left[ \frac{\bar{\theta}^* - E_{\mathbb{R}}(\theta_1^* | \mathbf{X}, \mathbf{Y})}{\sqrt{V_{\mathbb{R}}(\theta_1^* | \mathbf{X}, \mathbf{Y})/m}} < \frac{u - E_{\mathbb{R}}(\theta_1^* | \mathbf{X}, \mathbf{Y})}{\sqrt{V_{\mathbb{R}}(\theta_1^* | \mathbf{X}, \mathbf{Y})/m}} \middle| \mathbf{X}, \mathbf{Y} \right], \quad (20)$$

where  $E_{\mathbb{R}}(\theta_1^* | \mathbf{X}, \mathbf{Y})$  and  $V_{\mathbb{R}}(\theta_1^* | \mathbf{X}, \mathbf{Y})$  are the conditional mean and variance of  $\theta_1^*$  given the data,  $\mathbf{X}, \mathbf{Y}$ . Further, given  $\mathbf{X}, \mathbf{Y}$ , the random variables  $\{\theta_i^*, i = 1, 2, \dots, m\}$  are independent and

identically distributed with finite variance. Now by using the Central Limit Theorem, we have

$$\lim_{m \rightarrow \infty} \left\{ P_{\mathbb{R}} \left[ \bar{\theta}^* < u \mid \mathbf{X}, \mathbf{Y} \right] - \Phi \left( \frac{u - E_{\mathbb{R}}(\theta_1^* \mid \mathbf{X}, \mathbf{Y})}{\sqrt{V_{\mathbb{R}}(\theta_1^* \mid \mathbf{X}, \mathbf{Y})/m}} \right) \right\} = 0, \quad (21)$$

where  $\Phi(\cdot)$  is the standard normal cumulative distribution function. From (7),

$$\begin{aligned} & E_{\mathbb{R}}(\theta_1^* \mid \mathbf{X}, \mathbf{Y}) \\ &= E_{\mathbb{R}} \left[ 1 - F_{k, n-k+1} \left( \frac{n-k+1}{k} \cdot \frac{T_{\mathbb{R}_1}^2}{n} \right) \mid \mathbf{X}, \mathbf{Y} \right] \\ &= \int \left\{ 1 - F_{k, n-k+1} \left( \frac{n-k+1}{k} \cdot \frac{\frac{n_1 n_2}{n_1+n_2} (\bar{X} - \bar{Y})' R (R' S R)^{-1} R' (\bar{X} - \bar{Y})}{n_1 + n_2 - 2} \right) \right\} d\mathbf{P}_R, \end{aligned}$$

where  $\mathbf{P}_R$  is the probability measure corresponding to random matrix  $\mathbb{R}$ . We claim that distribution of  $E_{\mathbb{R}}(\theta_1^* \mid \mathbf{X}, \mathbf{Y})$  does not depend upon the parameters  $\mu_1, \mu_2$  and  $\Sigma$ . To verify this claim, it suffices to show that

$$\begin{aligned} & E_{\mathbf{X}, \mathbf{Y}} [E_{\mathbb{R}}(\theta_1^* \mid \mathbf{X}, \mathbf{Y})]^r \\ &= \int \left[ \int \left\{ 1 - F_{k, n-k+1} \left( \frac{n-k+1}{k} \cdot \frac{\frac{n_1 n_2}{n_1+n_2} (\bar{X} - \bar{Y})' R (R' S R)^{-1} R' (\bar{X} - \bar{Y})}{n_1 + n_2 - 2} \right) \right\} d\mathbf{P}_R \right]^r d\mathbf{P}_{\mathbf{X}, \mathbf{Y}} \end{aligned} \quad (22)$$

does not depend upon  $(\mu_1, \mu_2, \Sigma)$  for  $r = 1, 2, \dots$ , where  $\mathbf{P}_{\mathbf{X}, \mathbf{Y}}$  is the probability measure corresponding to the data  $\mathbf{X}, \mathbf{Y}$ .

Note that  $0 \leq E_{\mathbb{R}}(\theta_1^* \mid \mathbf{X}, \mathbf{Y}) \leq 1$ . Observe that

$$\begin{aligned} & \int \int \left\{ 1 - F_{k, n-k+1} \left( \frac{n-k+1}{k} \cdot \frac{\frac{n_1 n_2}{n_1+n_2} (\bar{X} - \bar{Y})' R (R' S R)^{-1} R' (\bar{X} - \bar{Y})}{n_1 + n_2 - 2} \right) \right\}^r d\mathbf{P}_R d\mathbf{P}_{\mathbf{X}, \mathbf{Y}} \quad (23) \\ &= \int \left[ \int \left\{ 1 - F_{k, n-k+1} \left( \frac{n-k+1}{k} \cdot \frac{\frac{n_1 n_2}{n_1+n_2} (\bar{X} - \bar{Y})' R (R' S R)^{-1} R' (\bar{X} - \bar{Y})}{n_1 + n_2 - 2} \right) \right\}^r d\mathbf{P}_{\mathbf{X}, \mathbf{Y}} \right] d\mathbf{P}_R, \end{aligned}$$

where the interchange of integral are permitted by Fubini's theorem. Now, observe that under  $\mathbf{H}_0$ , the distribution of  $F_{k, n-k+1} \left( \frac{n-k+1}{k} \cdot \frac{\frac{n_1 n_2}{n_1+n_2} (\bar{X} - \bar{Y})' R (R' S R)^{-1} R' (\bar{X} - \bar{Y})}{n_1 + n_2 - 2} \right)$  is  $U(0, 1)$  for any given Projection matrix  $R$ . Therefore, the inner integral

$$\int \left\{ 1 - F_{k, n-k+1} \left( \frac{n-k+1}{k} \cdot \frac{\frac{n_1 n_2}{n_1+n_2} (\bar{X} - \bar{Y})' R (R' S R)^{-1} R' (\bar{X} - \bar{Y})}{n_1 + n_2 - 2} \right) \right\}^r d\mathbf{P}_{\mathbf{X}, \mathbf{Y}} \quad (24)$$

does not depend upon the parameter  $(\mu_1, \mu_2, \Sigma)$ . This imply that (23) does not depend upon the parameter for any positive integer  $r$ .

Now note that, from (22) and by using Fubini theorem, we have

$$\begin{aligned} & E_{\mathbf{X}, \mathbf{Y}} [E_{\mathbb{R}}(\theta_1^* | \mathbf{X}, \mathbf{Y})]^r \\ &= \int \dots \int \left[ \int \prod_{i=1}^r \left\{ 1 - F_{k, n-k+1} \left( \frac{n-k+1}{k} \cdot \frac{\frac{n_1 n_2}{n_1+n_2} (\bar{X} - \bar{Y})' R_i (R_i' S R_i)^{-1} R_i' (\bar{X} - \bar{Y})}{n_1 + n_2 - 2} \right) \right\} d\mathbf{P}_{\mathbf{X}, \mathbf{Y}} \right] \prod_{i=1}^r d\mathbf{P}_{R_i} \end{aligned} \quad (25)$$

In (25), observe that  $R_i$ ,  $i = 1, \dots, r$ , are iid with probability measure  $P_R$ . By using this and (24), it follows that

$$\int \prod_{i=1}^r \left\{ 1 - F_{k, n-k+1} \left( \frac{n-k+1}{k} \cdot \frac{\frac{n_1 n_2}{n_1+n_2} (\bar{X} - \bar{Y})' R_i (R_i' S R_i)^{-1} R_i' (\bar{X} - \bar{Y})}{n_1 + n_2 - 2} \right) \right\} d\mathbf{P}_{\mathbf{X}, \mathbf{Y}},$$

does not depend upon the parameter  $(\mu_1, \mu_2, \Sigma)$  which in turn implies that (22) holds for any positive integer  $r$ . Similarly, under  $\mathbf{H}_0$ , the distribution of  $V_{\mathbb{R}}(\theta_1^* | \mathbf{X}, \mathbf{Y})$  also does not depend on the parameters. Now note that

$$\left| P_{\mathbb{R}} \left[ \bar{\theta}^* < u \mid \mathbf{X}, \mathbf{Y} \right] - \Phi \left( \frac{u - E_{\mathbb{R}}(\theta_1^* | \mathbf{X}, \mathbf{Y})}{\sqrt{V_{\mathbb{R}}(\theta_1^* | \mathbf{X}, \mathbf{Y}) / m}} \right) \right| < 2. \quad (26)$$

From (19), (21), (26) and the dominated convergence theorem, we have

$$\lim_{m \rightarrow \infty} \left\{ P[\bar{\theta}^* < u] - E_{\mathbf{X}, \mathbf{Y}} \left[ \Phi \left( \frac{u - E_{\mathbb{R}}(\theta_1^* | \mathbf{X}, \mathbf{Y})}{\sqrt{V_{\mathbb{R}}(\theta_1^* | \mathbf{X}, \mathbf{Y}) / m}} \right) \right] \right\} = 0$$

Thus, for any  $n_1, n_2$ , as  $m \rightarrow \infty$ , the asymptotic distribution of  $\frac{1}{m} \sum_{i=1}^m \theta_i^*$  does not depend on the parameters  $\mu_1, \mu_2$ , and  $\Sigma$ . This completes the proof.  $\square$

**Proof of Theorem 3** The power of the test (8) is

$$E[\phi^* | \mathbf{H}_1^*] = P \left[ \bar{\theta}^* < u_{\{\alpha, n_1, n_2\}} \mid \mathbf{H}_1^* \right],$$

where  $u_{\{\alpha, n_1, n_2\}}$  is such that

$$P \left[ \bar{\theta}^* < u_{\{\alpha, n_1, n_2\}} \mid \mathbf{H}_0 \right] = \alpha.$$

For a given  $\alpha$ ,  $n_1$ , and  $n_2$ , we have  $0 < u_{\{\alpha, n_1, n_2\}} < 1$ . Thus, there exists a convergent subsequence of  $u_{\{\alpha, n_1, n_2\}}$ . With an abuse of the notation, let this subsequence be  $u_{\{\alpha, n_1, n_2\}}$ , converging to  $u_{\alpha}$ .

We claim that  $u_\alpha > 0$ . To see this, note first that for all  $(n_1, n_2)$ ,  $P(\bar{\theta}^* \leq \epsilon | \mathbf{H}_0) \leq P(m^{-1}\theta_1 \leq \epsilon | \mathbf{H}_0) = \epsilon m$ , since  $\theta_i$  is uniform(0,1) distributed under  $\mathbf{H}_0$ . Thus, there exists a positive  $\epsilon$  such that  $P(\bar{\theta}^* \leq \epsilon | \mathbf{H}_0) < \alpha$  for all  $(n_1, n_2)$ . It follows that  $u_{\alpha, n_1, n_2} \geq \epsilon$  for all  $(n_1, n_2)$  and therefore  $u_\alpha \geq \epsilon > 0$ .

Let  $\nu$  be positive. Since  $\theta_i$  is the p-value of the test  $\phi(T_{\mathbb{R}}^2)$ , it follows from Theorem 1 (b) with  $\alpha = \nu$  that  $P(\theta_i < \nu | \mathbf{H}_1^*) = P(\phi(T_{\mathbb{R}}^2) = 1 | \mathbf{H}_1^*) \rightarrow 1$ . Therefore, since  $m$  is fixed and finite,  $P(\theta_i < \nu, i = 1, \dots, m | \mathbf{H}_1^*) \rightarrow 1$  and consequently,  $P(\bar{\theta}^* < \nu | \mathbf{H}_1^*) \rightarrow 1$ . This result holds for all  $\nu > 0$ . Since  $u_{\{\alpha, n_1, n_2\}} \rightarrow u_\alpha > 0$ , it follows that  $P(\bar{\theta}^* < u_{\{\alpha, n_1, n_2\}} | \mathbf{H}_1^*) \rightarrow 1$ , that is,  $\lim_{n_1, n_2 \rightarrow \infty} E[\phi^* | \mathbf{H}_1^*] = 1$ .

□
